# Supplementary material
Source: Springer Nature journal article supplement (https://www.springermedizin.de/resource/supplementary/12889_2014_6989_MOESM8_ESM.pdf/9499522)
Supplement: MOESM8 [file 9499522]

**Table 3: Questionnaire Key Concepts and Indicators**

| Key Concepts                                         | Indicators                                                                                                                                                                                                                                                                                                                                           |
|------------------------------------------------------|------------------------------------------------------------------------------------------------------------------------------------------------------------------------------------------------------------------------------------------------------------------------------------------------------------------------------------------------------|
| Current general dengue prevention practices          | <ul style="list-style-type: none"> <li>• Personal actions to destroy breeding sites within the home</li> <li>• Personal action to reduce amount of mature mosquitoes in the home</li> <li>• Awareness of actions taken by the government</li> <li>• Participation in collective community action</li> </ul>                                          |
| Attitudes to prevention                              | <ul style="list-style-type: none"> <li>• Methods perceived to be the most effective</li> <li>• Methods perceived to be the least effective</li> <li>• Reasons for not taking personal preventative action</li> <li>• Satisfaction with general dengue prevention</li> <li>• Perceptions of who holds responsibility for preventing dengue</li> </ul> |
| Use of the screen                                    | <ul style="list-style-type: none"> <li>• Complete or partial coverage of windows and doors in the house</li> <li>• Number of screens still hanging compared to original amount installed</li> <li>• Screen cleaning and maintenance practices</li> </ul>                                                                                             |
| Screen effect                                        | <ul style="list-style-type: none"> <li>• Effect on domestic mosquito amount and biting</li> <li>• Effect on other pests</li> </ul>                                                                                                                                                                                                                   |
| General acceptance and satisfaction with the project | <ul style="list-style-type: none"> <li>• Satisfaction with the screens</li> <li>• Satisfaction with installation</li> <li>• Would they recommend it to another city</li> <li>• Recommended areas for improvement</li> </ul>                                                                                                                          |
